# Supplementary material for: Detailed analysis and comparison of different activity metrics
Source: PLOS journal article supplement (doi:10.1371/journal.pone.0261718), 2021-12-21
Supplement: S6 (10.1371/journal.pone.0261718.s006) [file journal.pone.0261718.s006.pdf]

## S5 Appendix – Further indicators based on the activity signals determined per axis using TAT and MAD metrics

In the article, Fig 11 presents the analysis of further indicators based on the PIM and ZCM metrics. In addition to this, the following figure presents the same analysis in the case of TAT and MAD metrics.

|                                                                   | PIM(UFNM) | ENMO | HFEN | PIM(FMpre) | ZCM(FMpre) | TAT(FMpre) | MAD(FMpre) | PIM(FMpost) | ZCM(FMpost) | TAT(FMpost) | MAD(FMpost) | AI(FXYZ) |
|-------------------------------------------------------------------|-----------|------|------|------------|------------|------------|------------|-------------|-------------|-------------|-------------|----------|
| (a) TAT(FMpre)                                                    | 0.9       | 0.86 | 0.97 | 0.98       | 0.85       | 1          | 0.88       | 0.91        | 0.94        | 0.93        | 0.91        | 0.94     |
| TAT(FMpost)                                                       | 0.96      | 0.92 | 0.9  | 0.91       | 0.81       | 0.93       | 0.75       | 0.98        | 0.99        | 1           | 0.98        | 0.84     |
| TAT(FX)                                                           | 0.89      | 0.85 | 0.96 | 0.97       | 0.82       | 0.98       | 0.88       | 0.9         | 0.91        | 0.91        | 0.9         | 0.94     |
| TAT(FY)                                                           | 0.91      | 0.88 | 0.95 | 0.96       | 0.8        | 0.97       | 0.84       | 0.93        | 0.94        | 0.95        | 0.93        | 0.91     |
| TAT(FZ)                                                           | 0.84      | 0.81 | 0.96 | 0.96       | 0.81       | 0.97       | 0.89       | 0.85        | 0.87        | 0.86        | 0.85        | 0.94     |
| TAT(FX)+TAT(FY)+TAT(FZ)                                           | 0.9       | 0.87 | 0.98 | 0.99       | 0.83       | 1          | 0.89       | 0.91        | 0.93        | 0.93        | 0.91        | 0.95     |
| $\sqrt{TAT(FX)+TAT(FY)+TAT(FZ)}$                                  | 0.81      | 0.77 | 0.93 | 0.94       | 0.86       | 0.95       | 0.94       | 0.82        | 0.85        | 0.84        | 0.82        | 0.96     |
| TAT(FX) <sup>2</sup>                                              | 0.9       | 0.88 | 0.9  | 0.9        | 0.68       | 0.9        | 0.72       | 0.9         | 0.88        | 0.9         | 0.9         | 0.82     |
| TAT(FY) <sup>2</sup>                                              | 0.91      | 0.89 | 0.86 | 0.87       | 0.66       | 0.87       | 0.67       | 0.92        | 0.9         | 0.92        | 0.92        | 0.78     |
| TAT(FZ) <sup>2</sup>                                              | 0.84      | 0.81 | 0.9  | 0.91       | 0.67       | 0.9        | 0.76       | 0.84        | 0.83        | 0.84        | 0.84        | 0.84     |
| TAT(FX) <sup>2</sup> +TAT(FY) <sup>2</sup> +TAT(FZ) <sup>2</sup>  | 0.93      | 0.9  | 0.93 | 0.94       | 0.7        | 0.93       | 0.75       | 0.93        | 0.92        | 0.93        | 0.93        | 0.85     |
| $\sqrt{TAT(FX)^2+TAT(FY)^2+TAT(FZ)^2}$                            | 0.85      | 0.85 | 0.79 | 0.79       | 0.47       | 0.76       | 0.56       | 0.85        | 0.78        | 0.82        | 0.85        | 0.69     |
| TAT(FX <sup>2</sup> )                                             | 0.86      | 0.86 | 0.92 | 0.92       | 0.6        | 0.87       | 0.84       | 0.86        | 0.8         | 0.83        | 0.86        | 0.89     |
| TAT(FY <sup>2</sup> )                                             | 0.9       | 0.89 | 0.9  | 0.9        | 0.61       | 0.87       | 0.79       | 0.9         | 0.85        | 0.88        | 0.9         | 0.85     |
| TAT(FZ <sup>2</sup> )                                             | 0.78      | 0.77 | 0.91 | 0.92       | 0.61       | 0.87       | 0.86       | 0.78        | 0.75        | 0.77        | 0.78        | 0.89     |
| TAT(FX <sup>2</sup> )+TAT(FY <sup>2</sup> )+TAT(FZ <sup>2</sup> ) | 0.9       | 0.89 | 0.96 | 0.97       | 0.64       | 0.92       | 0.88       | 0.9         | 0.85        | 0.88        | 0.9         | 0.93     |
| $\sqrt{TAT(FX^2)+TAT(FY^2)+TAT(FZ^2)}$                            | 0.84      | 0.81 | 0.96 | 0.97       | 0.76       | 0.95       | 0.97       | 0.85        | 0.85        | 0.85        | 0.85        | 0.99     |
| (b) MAD(FMpre)                                                    | 0.77      | 0.75 | 0.92 | 0.92       | 0.71       | 0.88       | 0.77       | 0.77        | 0.75        | 0.75        | 0.77        | 0.98     |
| MAD(FMpost)                                                       | 0.99      | 0.96 | 0.92 | 0.92       | 0.75       | 0.91       | 0.77       | 1           | 0.96        | 0.98        | 1           | 0.86     |
| MAD(FX)                                                           | 0.9       | 0.88 | 0.98 | 0.98       | 0.77       | 0.95       | 0.9        | 0.9         | 0.88        | 0.89        | 0.91        | 0.96     |
| MAD(FY)                                                           | 0.93      | 0.91 | 0.97 | 0.97       | 0.76       | 0.95       | 0.94       | 0.94        | 0.92        | 0.93        | 0.87        | 0.93     |
| MAD(FZ)                                                           | 0.85      | 0.82 | 0.97 | 0.97       | 0.77       | 0.95       | 0.84       | 0.84        | 0.84        | 0.84        | 0.92        | 0.95     |
| MAD(FX)+MAD(FY)+MAD(FZ)                                           | 0.92      | 0.89 | 1    | 1          | 0.79       | 0.98       | 0.92       | 0.92        | 0.9         | 0.91        | 0.92        | 0.97     |
| $\sqrt{MAD(FX)+MAD(FY)+MAD(FZ)}$                                  | 0.85      | 0.82 | 0.97 | 0.97       | 0.84       | 0.96       | 0.86       | 0.86        | 0.87        | 0.86        | 0.95        | 0.98     |
| MAD(FX) <sup>2</sup>                                              | 0.87      | 0.88 | 0.87 | 0.86       | 0.54       | 0.79       | 0.84       | 0.84        | 0.76        | 0.79        | 0.73        | 0.8      |
| MAD(FY) <sup>2</sup>                                              | 0.89      | 0.9  | 0.84 | 0.84       | 0.54       | 0.79       | 0.88       | 0.88        | 0.8         | 0.83        | 0.68        | 0.77     |
| MAD(FZ) <sup>2</sup>                                              | 0.81      | 0.81 | 0.88 | 0.88       | 0.57       | 0.83       | 0.79       | 0.79        | 0.74        | 0.77        | 0.77        | 0.83     |
| MAD(FX) <sup>2</sup> +MAD(FY) <sup>2</sup> +MAD(FZ) <sup>2</sup>  | 0.91      | 0.92 | 0.91 | 0.91       | 0.58       | 0.84       | 0.89       | 0.89        | 0.81        | 0.84        | 0.76        | 0.84     |
| $\sqrt{MAD(FX)^2+MAD(FY)^2+MAD(FZ)^2}$                            | 0.62      | 0.67 | 0.56 | 0.56       | 0.21       | 0.45       | 0.58       | 0.58        | 0.44        | 0.48        | 0.43        | 0.5      |
| MAD(FX <sup>2</sup> )                                             | 0.79      | 0.81 | 0.85 | 0.84       | 0.51       | 0.75       | 0.77       | 0.77        | 0.67        | 0.7         | 0.84        | 0.85     |
| MAD(FY <sup>2</sup> )                                             | 0.84      | 0.86 | 0.86 | 0.86       | 0.54       | 0.78       | 0.83       | 0.83        | 0.73        | 0.77        | 0.81        | 0.85     |
| MAD(FZ <sup>2</sup> )                                             | 0.75      | 0.75 | 0.86 | 0.86       | 0.55       | 0.78       | 0.74       | 0.74        | 0.67        | 0.7         | 0.86        | 0.87     |
| MAD(FX <sup>2</sup> )+MAD(FY <sup>2</sup> )+MAD(FZ <sup>2</sup> ) | 0.84      | 0.86 | 0.91 | 0.91       | 0.56       | 0.82       | 0.83       | 0.83        | 0.74        | 0.77        | 0.89        | 0.91     |
| $\sqrt{MAD(FX^2)+MAD(FY^2)+MAD(FZ^2)}$                            | 0.82      | 0.8  | 0.95 | 0.95       | 0.73       | 0.91       | 0.82       | 0.82        | 0.8         | 0.81        | 0.99        | 1        |

SFig 1. Extension of the article's Fig 11.
